# Supplementary material for: Divergence in Gut Bacterial Community Among Life Stages of the Rainbow Stag Beetle Phalacrognathus muelleri (Coleptera: Lucanidae)
Source: PubMed Central journal article supplement (PMC7589407; doi:10.3390/insects11100719), 2020-10-21
Supplement: insects-11-00719-s001.pdf [file insects-11-00719-s001.pdf]

# Divergence in gut bacterial community among life stages of the rainbow stag beetle *Phalacrognathus muelleri* (Coleoptera: Lucanidae)

Miaomiao Wang <sup>1,2,†</sup>, Xingjia Xiang <sup>1,2,†</sup> and Xia Wan <sup>1,2,\*</sup>

<sup>1</sup> School of Resources and Environmental Engineering, Anhui University, Hefei 230601, China; m\_13228430417@163.com (M.W.); xjxiang@ahu.edu.cn (X.X.);

<sup>2</sup> Anhui Province Key Laboratory of Wetland Ecosystem Protection and Restoration, Hefei 230601, China.

\* Correspondence: wanxia@ahu.edu.cn

† These authors contributed equally to this article.

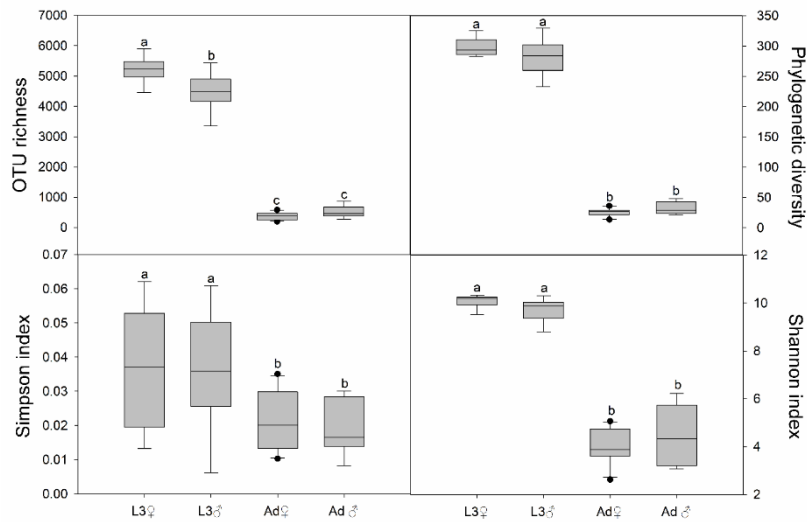

**Figure S1.** Intestinal bacterial alpha-diversity in different sexes. The bottom and top of the box denote the first and third quartiles, respectively; the band inside the box denotes the median; error bars denote standard deviations; different letters above bars represent significant differences from Tukey's HSD comparisons ( $P < 0.05$ ).

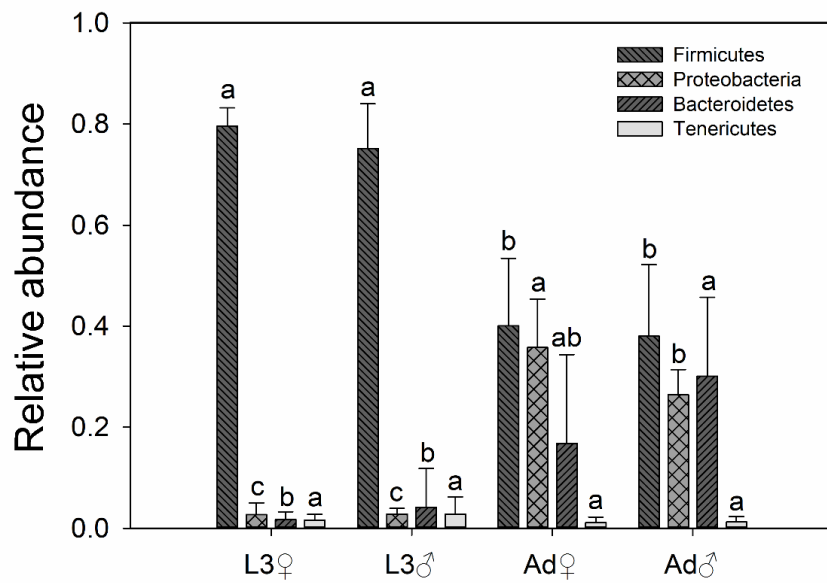

**Figure S2.** Relative abundance of bacterial taxa at the phylum level in the guts of different sexes of *P. muelleri*. The bottom and top of the box denote the first and third quartiles respectively; the band inside the box denotes median; error bars denote standard deviations; different letters above bars represent significant differences from Tukey's HSD comparisons ( $P < 0.05$ ). L3, 3rd female; Ad, Adults; ♀ female, ♂ male.

**Table S1.** All sample materials of *Phalacrognathus Muelleri*, after removing outlier sample values.

| <i>Phalacrognathus muelleri</i> | Number | Artificial feeding conditions                           |
|---------------------------------|--------|---------------------------------------------------------|
| Adults-female                   | 10     |                                                         |
| Adults-male                     | 6      | The larvae fed on fermented wood chips, with a          |
| 3rd instar-female               | 9      | moisture content of about 55%, and the adults fed on    |
| 3rd instar-male                 | 9      | beetle jelly. The best breeding temperature is 18–22°C. |
| 2nd instar                      | 12     |                                                         |
| 1st instar                      | 8      |                                                         |

10,6,9,9,12,8 represents the number of beetles in each stage.

**Table S2.** Gut bacterial sequences across the samples.

| Sample | Sequences | OTU-richness | Evenness | Phylogenetic | Shannon |
|--------|-----------|--------------|----------|--------------|---------|
|        | Bacteria  |              |          | diversity    |         |
| pha1   | 29673     | 3503.2       | 0.010    | 189.56       | 8.208   |
| pha2   | 36430     | 2696.4       | 0.015    | 151.44       | 7.812   |
| pha3   | 36859     | 4565.3       | 0.008    | 261.33       | 8.480   |
| pha4   | 30217     | 4820.4       | 0.015    | 249.76       | 9.330   |
| pha5   | 35961     | 3983.2       | 0.014    | 212.49       | 8.769   |
| pha6   | 40006     | 4635.5       | 0.016    | 241.14       | 9.212   |
| pha7   | 32011     | 2766.5       | 0.008    | 186.06       | 7.724   |
| pha8   | 60787     | 2160.7       | 0.015    | 133.54       | 7.455   |
| pha9   | 31814     | 5277.3       | 0.035    | 305.81       | 10.112  |
| pha10  | 34380     | 4585.0       | 0.030    | 276.66       | 9.577   |
| pha11  | 33717     | 4455.9       | 0.016    | 233.13       | 9.083   |
| pha12  | 33756     | 4707.5       | 0.029    | 294.33       | 9.729   |
| pha13  | 36861     | 5302.4       | 0.019    | 281.57       | 9.684   |
| pha14  | 37581     | 5175.8       | 0.022    | 270.19       | 9.673   |
| pha15  | 39506     | 4348.1       | 0.006    | 278.03       | 9.063   |
| pha16  | 36095     | 5120.2       | 0.014    | 323.55       | 9.623   |
| pha17  | 33834     | 3343.5       | 0.046    | 232.60       | 9.012   |
| pha18  | 32762     | 2556.6       | 0.006    | 169.67       | 6.990   |
| pha19  | 39560     | 4962.0       | 0.015    | 296.34       | 9.639   |
| pha20  | 39127     | 2734.8       | 0.002    | 171.20       | 6.312   |
| pha21  | 30612     | 5439.8       | 0.026    | 283.81       | 9.882   |
| pha22  | 31727     | 5080.4       | 0.047    | 293.10       | 10.200  |
| pha23  | 26193     | 5906.9       | 0.013    | 325.49       | 10.079  |
| pha24  | 37706     | 5525.4       | 0.037    | 288.04       | 10.211  |
| pha25  | 46267     | 5244.8       | 0.062    | 311.83       | 10.329  |
| pha26  | 35618     | 4455.1       | 0.013    | 283.24       | 9.516   |
| pha27  | 44946     | 4862.6       | 0.036    | 291.03       | 9.960   |

|       |       |        |       |        |        |
|-------|-------|--------|-------|--------|--------|
| pha28 | 40781 | 5248.4 | 0.050 | 308.12 | 10.254 |
| pha29 | 38875 | 5218.2 | 0.055 | 308.67 | 10.259 |
| pha30 | 34989 | 4812.7 | 0.031 | 289.75 | 10.040 |
| pha31 | 30947 | 4762.5 | 0.049 | 302.67 | 10.056 |
| pha32 | 28145 | 4189.6 | 0.061 | 272.73 | 9.876  |
| pha33 | 33067 | 4351.2 | 0.036 | 247.50 | 9.841  |
| pha34 | 36097 | 4471.7 | 0.044 | 283.67 | 9.941  |
| pha35 | 39726 | 5440.2 | 0.052 | 329.43 | 10.315 |
| pha36 | 42321 | 4974.8 | 0.006 | 302.10 | 9.178  |
| pha37 | 34628 | 4134.7 | 0.032 | 278.33 | 9.534  |
| pha38 | 29080 | 3363.0 | 0.021 | 232.92 | 8.793  |
| pha39 | 32243 | 385.7  | 0.029 | 27.52  | 4.680  |
| pha40 | 36489 | 433.7  | 0.010 | 28.56  | 3.580  |
| pha41 | 37618 | 453.8  | 0.019 | 25.69  | 4.460  |
| pha42 | 29850 | 307.0  | 0.022 | 22.46  | 3.838  |
| pha43 | 31216 | 524.0  | 0.023 | 31.77  | 4.921  |
| pha44 | 37560 | 581.8  | 0.016 | 36.16  | 5.058  |
| pha45 | 33942 | 242.9  | 0.012 | 21.61  | 2.621  |
| pha46 | 34815 | 247.0  | 0.031 | 19.79  | 3.901  |
| pha47 | 33558 | 201.0  | 0.035 | 13.81  | 3.616  |
| pha48 | 37217 | 383.0  | 0.014 | 27.47  | 3.857  |
| pha49 | 50726 | 452.3  | 0.017 | 24.99  | 4.341  |
| pha50 | 61214 | 278.1  | 0.016 | 21.24  | 3.066  |
| pha51 | 35285 | 419.4  | 0.008 | 25.28  | 3.264  |
| pha52 | 35933 | 455.3  | 0.016 | 32.57  | 4.305  |
| pha53 | 53668 | 865.0  | 0.030 | 48.14  | 6.227  |
| pha54 | 43398 | 602.3  | 0.028 | 41.07  | 5.563  |

---

pha, phalacrognathus muelleri.

**Table S3.** SIMPER analysis showing the contribution of bacteria OTUs to the differences in bacterial community composition in the gut depending on different life stages. Taxonomic leaves: o, order; f, family; g, genus; s, species.

| OTU   | Taxa                        | Contribution (%) |          |          |          |          |          |
|-------|-----------------------------|------------------|----------|----------|----------|----------|----------|
|       |                             | L1 vs L2         | L1 VS L3 | L1 VS Ad | L2 VS L3 | L2 VS Ad | L3 VS Ad |
| 46981 | <i>g_Sporomusa</i>          | 2.91             | 2.94     | 2.89     | 0.80     | —        | —        |
| 63703 | <i>f_Ruminococcaceae</i>    | 2.14             | 2.17     | —        | —        | —        | —        |
| 9882  | <i>g_Dysgonomonas</i>       | 1.85             | —        | —        | 1.74     | 1.60     | —        |
| 64289 | <i>f_Ruminococcaceae</i>    | 1.85             | 1.85     | —        | —        | —        | —        |
| 63013 | <i>f_Ruminococcaceae</i>    | 1.60             | 1.63     | —        | —        | —        | —        |
| 22575 | <i>f_Ruminococcaceae</i>    | —                | 1.36     | —        | —        | —        | —        |
| 38714 | <i>g_Dysgonomonas</i>       | —                | —        | 7.72     | —        | 7.71     | 7.72     |
| 53348 | <i>o_Lactobacillales</i>    | —                | —        | 4.04     | —        | 4.04     | 4.04     |
| 16920 | <i>f_Enterococcaceae</i>    | —                | —        | 2.25     | —        | 2.25     | —        |
| 56864 | <i>f_Enterobacteriaceae</i> | —                | —        | 2.25     | —        | 2.25     | 2.25     |
| 3991  | <i>f_Ruminococcaceae</i>    | —                | —        | —        | 1.03     | —        | —        |
| 41803 | <i>g_Dysgonomonas</i>       | —                | —        | —        | 1.03     | —        | —        |
| 51020 | <i>f_Ruminococcaceae</i>    | —                | —        | —        | 0.89     | —        | —        |
| 16920 | <i>g_Enterococcus</i>       | —                | —        | —        | —        | —        | 2.25     |
| 53432 | <i>g_Enterococcus</i>       | —                | —        | —        | —        | —        | 1.60     |

L1, 1st instar; L2, 2nd instar; L3, 3rd instar; Ad, Adults.

**Table S4.** Indicator species in different life stages. Taxonomic leaves: p, phylum; o, order; f, family; g, genus; s, species.

| Age | Indicator species | Taxonomy                                              | P     | Relative abundance (%) |
|-----|-------------------|-------------------------------------------------------|-------|------------------------|
| L1  | OTU46981          | g__ <i>Sporomusa</i>                                  | 0.001 | 1.380                  |
|     | OTU63703          | f__Ruminococcaceae                                    | 0.001 | 1.010                  |
|     | OTU64289          | f__Ruminococcaceae                                    | 0.001 | 0.796                  |
|     | OTU63013          | f__Ruminococcaceae                                    | 0.001 | 0.752                  |
|     | OTU39327          | f__Veillonellaceae                                    | 0.004 | 0.527                  |
|     | OTU22575          | f__Ruminococcaceae                                    | 0.001 | 0.374                  |
|     | OTU2880           | f__Lachnospiraceae                                    | 0.001 | 0.314                  |
|     | OTU59017          | f__Lachnospiraceae                                    | 0.001 | 0.255                  |
|     | OTU64163          | f__Ruminococcaceae                                    | 0.008 | 0.185                  |
|     | OTU54096          | o__Clostridiales                                      | 0.001 | 0.181                  |
|     | OTU22369          | o__Clostridiales                                      | 0.009 | 0.178                  |
|     | OTU45631          | f__Ruminococcaceae                                    | 0.001 | 0.151                  |
|     | OTU59433          | o__Clostridiales                                      | 0.001 | 0.143                  |
|     | OTU17749          | f__Christensenellaceae                                | 0.002 | 0.136                  |
|     | OTU22431          | f__Veillonellaceae                                    | 0.040 | 0.117                  |
|     | OTU43374          | g__ <i>Candidatus</i><br>s__ <i>Xiphinematobacter</i> | 0.031 | 0.107                  |
|     | OTU57033          | g__ <i>Coprococcus</i>                                | 0.015 | 0.106                  |
| L2  | OTU3991           | f__Ruminococcaceae                                    | 0.002 | 0.002                  |
|     | OTU56399          | f__Ruminococcaceae                                    | 0.043 | 0.043                  |
|     | OTU62347          | f__Ruminococcaceae                                    | 0.003 | 0.003                  |
|     | OTU7266           | f__Veillonellaceae                                    | 0.011 | 0.011                  |
| L3  | OTU54440          | o__Clostridiales                                      | 0.047 | 0.236                  |
|     | OTU40364          | f__Ruminococcaceae                                    | 0.011 | 0.190                  |
|     | OTU46566          | g__ <i>Prevotella</i>                                 | 0.017 | 0.132                  |
|     | OTU53750          | f__Ruminococcaceae                                    | 0.035 | 0.118                  |
|     | OTU12535          | f__Christensenellaceae                                | 0.011 | 0.108                  |
|     | OTU20496          | p__Tenericutes                                        | 0.004 | 0.105                  |
|     | OTU33251          | g__ <i>Turicibacter</i>                               | 0.019 | 0.105                  |
| Ad  | OTU38714          | g__ <i>Dysgonomonas</i>                               | 0.001 | 4.570                  |
|     | OTU53348          | o__Lactobacillales                                    | 0.001 | 2.390                  |
|     | OTU16920          | g__ <i>Enterococcus</i>                               | 0.001 | 1.330                  |
|     | OTU56864          | f__Enterobacteriaceae                                 | 0.001 | 1.330                  |
|     | OTU53432          | g__ <i>Enterococcus</i>                               | 0.004 | 0.943                  |
|     | OTU22437          | g__ <i>Lactococcus</i>                                | 0.001 | 0.889                  |
|     | OTU37829          | f__Enterobacteriaceae                                 | 0.001 | 0.719                  |

|          |                                                   |       |       |
|----------|---------------------------------------------------|-------|-------|
| OTU56978 | <i>g__Trabulsiella; s__farmeri</i>                | 0.001 | 0.658 |
| OTU6013  | <i>g__Neorickettsia</i>                           | 0.001 | 0.621 |
| OTU28724 | <i>g__Dysgonomonas</i>                            | 0.01  | 0.565 |
| OTU22440 | <i>o__Pasteurellales</i>                          | 0.001 | 0.503 |
| OTU56171 | <i>f__Spirochaetaceae</i>                         | 0.001 | 0.459 |
| OTU1011  | <i>g__Enterococcus</i>                            | 0.002 | 0.414 |
| OTU10350 | <i>f__Enterobacteriaceae</i>                      | 0.008 | 0.410 |
| OTU2298  | <i>g__Enterococcus</i>                            | 0.024 | 0.379 |
| OTU11298 | <i>g__Enterococcus</i><br><i>s__casseliflavus</i> | 0.001 | 0.360 |
| OTU21712 | <i>g__Dysgonomonas</i>                            | 0.004 | 0.347 |
| OTU56564 | <i>f__Enterobacteriaceae</i>                      | 0.035 | 0.341 |
| OTU6148  | <i>g__Enterococcus</i>                            | 0.003 | 0.308 |
| OTU22423 | <i>g__Dysgonomonas</i>                            | 0.005 | 0.251 |
| OTU22434 | <i>g__Dysgonomonas</i>                            | 0.028 | 0.251 |
| OTU9685  | <i>g__Trabulsiella; s__farmeri</i>                | 0.001 | 0.245 |
| OTU56505 | <i>f__Enterobacteriaceae</i>                      | 0.001 | 0.226 |
| OTU933   | <i>g__Enterococcus</i>                            | 0.005 | 0.218 |
| OTU19711 | <i>g__Enterococcus</i>                            | 0.001 | 0.204 |
| OTU53514 | <i>o__Pasteurellales</i>                          | 0.001 | 0.184 |
| OTU61281 | <i>g__Lactococcus</i>                             | 0.001 | 0.179 |
| OTU25877 | <i>f__Enterobacteriaceae</i>                      | 0.01  | 0.176 |
| OTU55930 | <i>g__Trabulsiella; s__farmeri</i>                | 0.001 | 0.173 |
| OTU55229 | <i>f__Enterobacteriaceae</i>                      | 0.003 | 0.161 |
| OTU21311 | <i>p__Tenericutes</i>                             | 0.001 | 0.141 |
| OTU43367 | <i>p__Tenericutes</i>                             | 0.004 | 0.136 |
| OTU24969 | <i>g__Trabulsiella; s__farmeri</i>                | 0.003 | 0.125 |
| OTU53191 | <i>f__Enterobacteriaceae</i>                      | 0.001 | 0.125 |
| OTU54956 | <i>f__Enterobacteriaceae</i>                      | 0.001 | 0.114 |
| OTU47524 | <i>g__Enterococcus</i>                            | 0.011 | 0.106 |
| OTU20888 | <i>g__Selenomonas</i>                             | 0.003 | 0.101 |

---

L1, 1st instar; L2, 2nd instar; L3, 3rd instar; Ad, Adults.

**Table S5.** Indicator species in different sexes. Taxonomic leaves: p, phylum; c, class; f, family; g, genus; s, species.

| Age  | Indicator species | Taxonomy               | P     | Relative abundance (%) |
|------|-------------------|------------------------|-------|------------------------|
| L3 ♀ | OTU59017          | f__Lachnospiraceae     | 0.024 | 0.255                  |
|      | OTU45631          | f__Ruminococcaceae     | 0.017 | 0.151                  |
|      | OTU17749          | f__Christensenellaceae | 0.019 | 0.136                  |
|      | OTU12535          | f__Christensenellaceae | 0.034 | 0.107                  |
|      | OTU7266           | f__Veillonellaceae     | 0.037 | 0.104                  |
|      | OTU61323          | f__Ruminococcaceae     | 0.010 | 0.101                  |
|      | OTU47622          | f__Ruminococcaceae     | 0.023 | 0.083                  |
|      | OTU27998          | f__Veillonellaceae     | 0.030 | 0.082                  |
|      | OTU18152          | f__Veillonellaceae     | 0.030 | 0.081                  |
|      | OTU44853          | g__Sporomusa           | 0.050 | 0.078                  |
|      | OTU64052          | f__Ruminococcaceae     | 0.006 | 0.070                  |
| L3 ♂ | OTU30174          | f__Lachnospiraceae     | 0.050 | 0.052                  |
|      | OTU18618          | o__Clostridiales       | 0.005 | 0.051                  |
| Ad ♀ | OTU28724          | g__Dysgonomonas        | 0.018 | 0.565                  |
|      | OTU53514          | o__Pasteurellales      | 0.033 | 0.184                  |
|      | OTU25626          | g__Dysgonomonas        | 0.039 | 0.015                  |
|      | OTU27484          | o__Pasteurellales      | 0.004 | 0.014                  |
|      | OTU37474          | g__Trabulsiella        | 0.03  | 0.013                  |
|      | OTU32338          | g__Enterococcus        | 0.006 | 0.009                  |
|      | OTU21328          | g__Lactococcus         | 0.02  | 0.009                  |
|      | OTU5616           | o__Lactobacillales     | 0.028 | 0.007                  |
|      | OTU49107          | g__Enterococcus        | 0.029 | 0.006                  |

L3 ♀, 3rd female; L3 ♂ 3rd male; Ad ♀, Adults female.

**Table S6.** The total OTU table. L1, 1st instar; L2, 2nd instar; L3, 3rd instar; Ad, Adults, ♀, female; ♂ male.

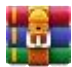

OTU.rar
